# Supplementary material
Source: PubMed Central journal article supplement (PMC9617375)

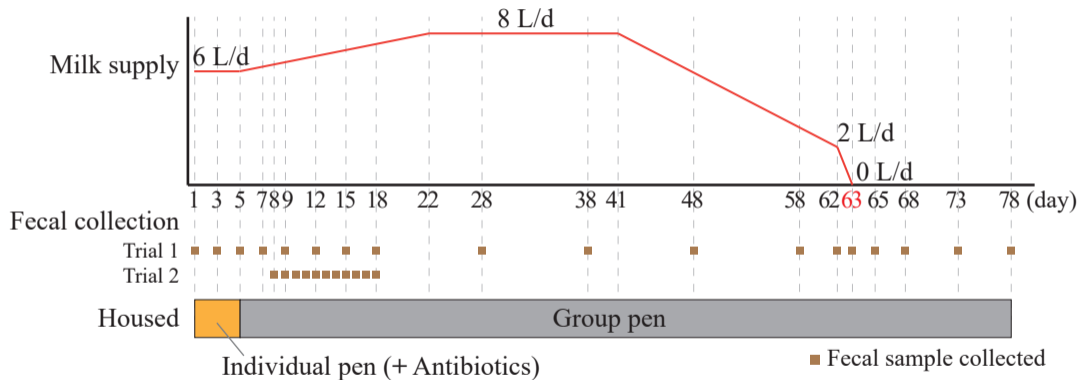

Supplement: 40104_2022_758_MOESM1_ESM.pdf [file 40104_2022_758_MOESM1_ESM.pdf]
