# Supplementary material
Source: PubMed Central journal article supplement (PMC9617375)

Diarrheic

Non-diarrheic

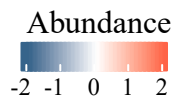

Diarrheic status

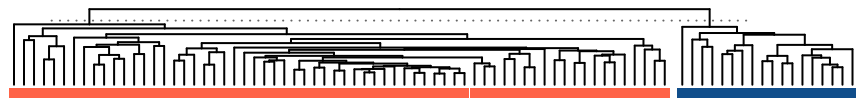

Non-diarrheic associated ASV

Diarrheic associated ASV

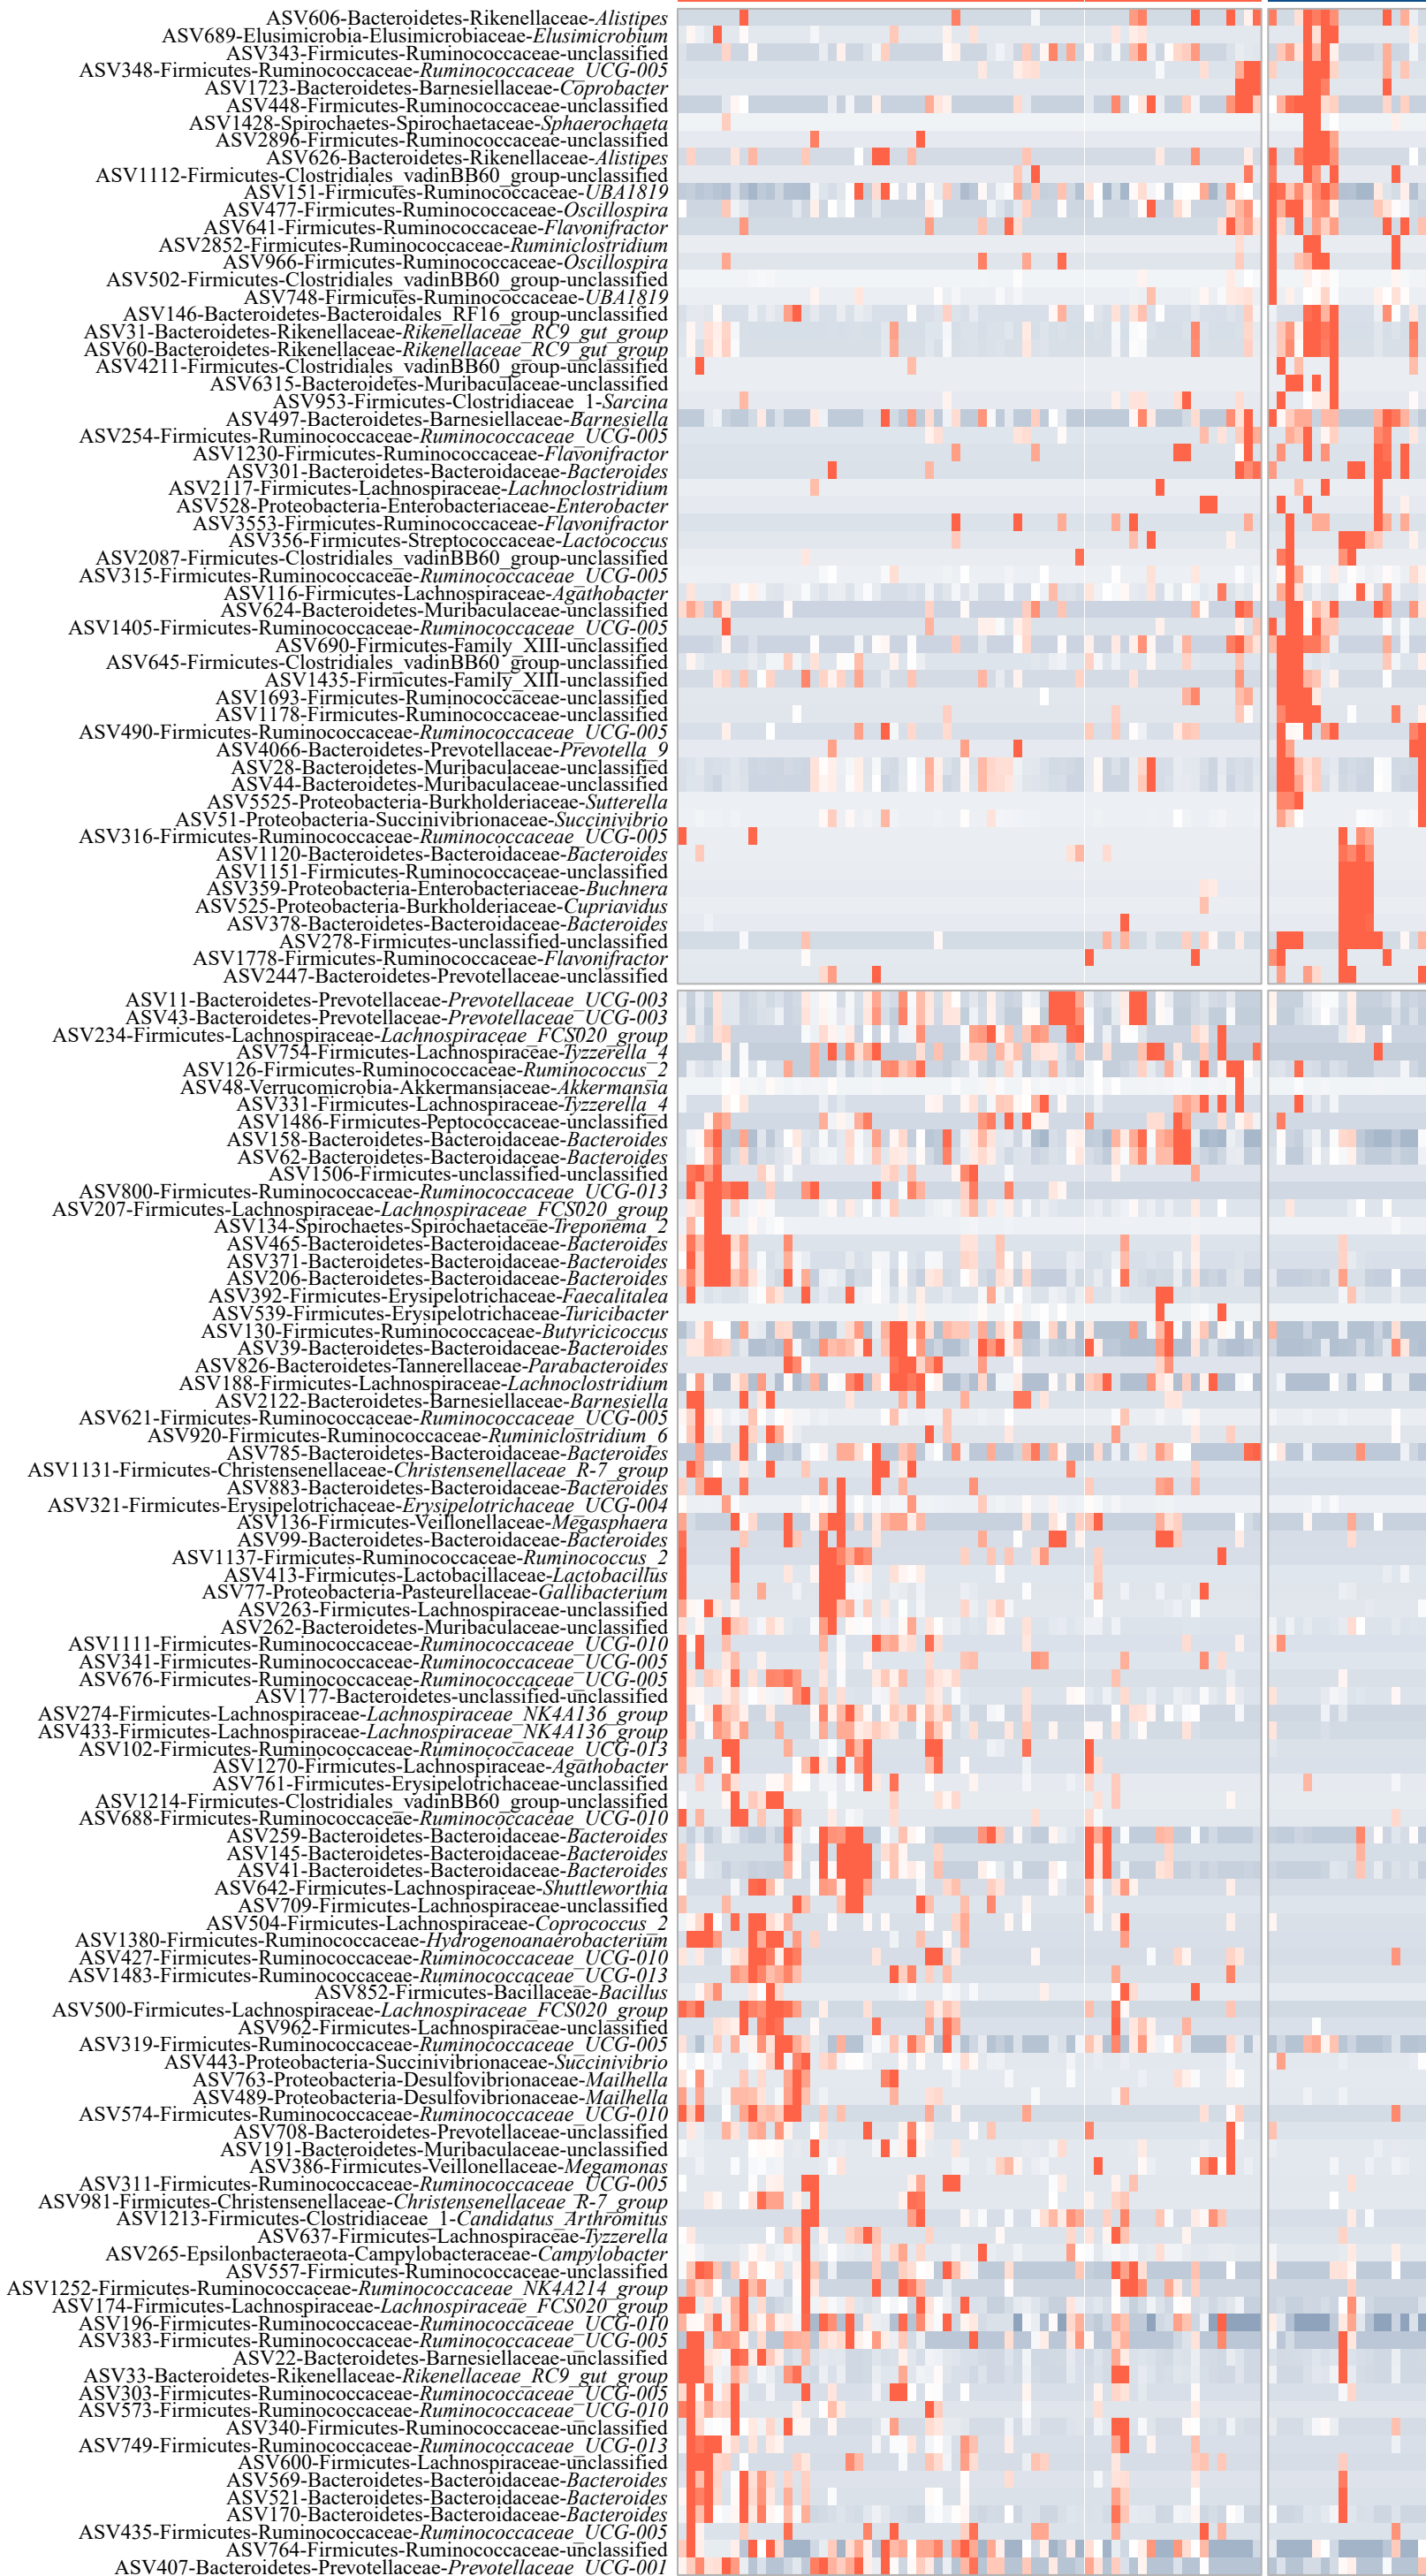

Supplement: 40104_2022_758_MOESM2_ESM.pdf [file 40104_2022_758_MOESM2_ESM.pdf]
