# Supplementary material
Source: PubMed Central journal article supplement (PMC9617375)
Supplement: 40104_2022_758_MOESM4_ESM.pdf [file 40104_2022_758_MOESM4_ESM.pdf]

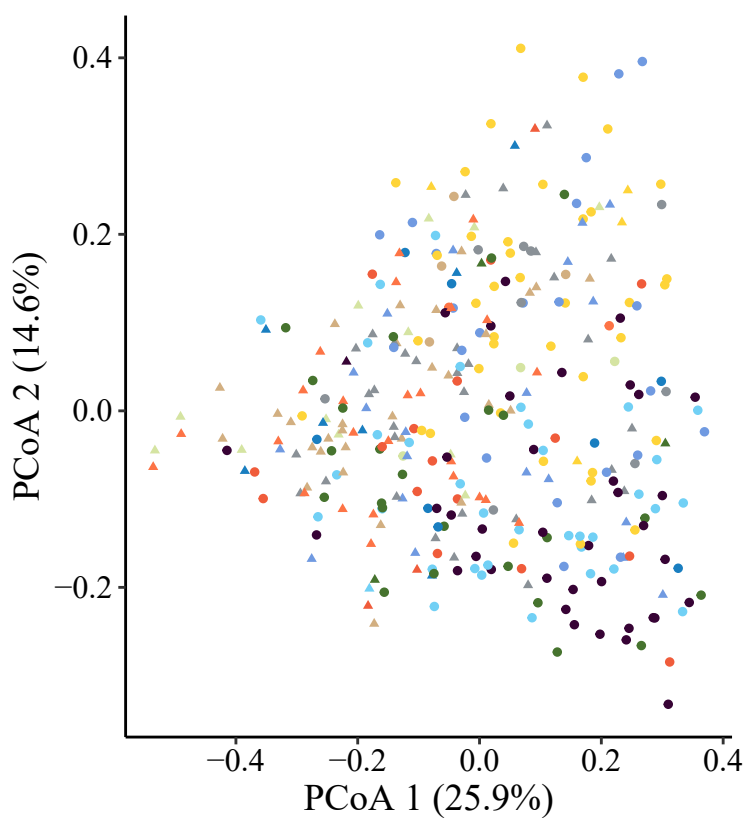

### Diarrheic status

- ▲ Diarrheic
- Non-diarrheic

### Age

- 8
- 9
- 10
- 11
- 12
- 13
- 14
- 15
- 16
- 17
- 18

| Age | <i>P</i> |
|-----|----------|
| 8   | 0.65     |
| 9   | 0.00     |
| 10  | 0.01     |
| 11  | 0.01     |
| 12  | 0.06     |
| 13  | 0.12     |
| 14  | 0.14     |
| 15  | 0.38     |
| 16  | 0.50     |
| 17  | 0.41     |
| 18  | 0.07     |
