# Supplementary material
Source: PubMed Central journal article supplement (PMC9617375)
Supplement: 40104_2022_758_MOESM5_ESM.pdf [file 40104_2022_758_MOESM5_ESM.pdf]

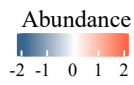

Phase

pre-diarrhea post-diarrhea diarrhea

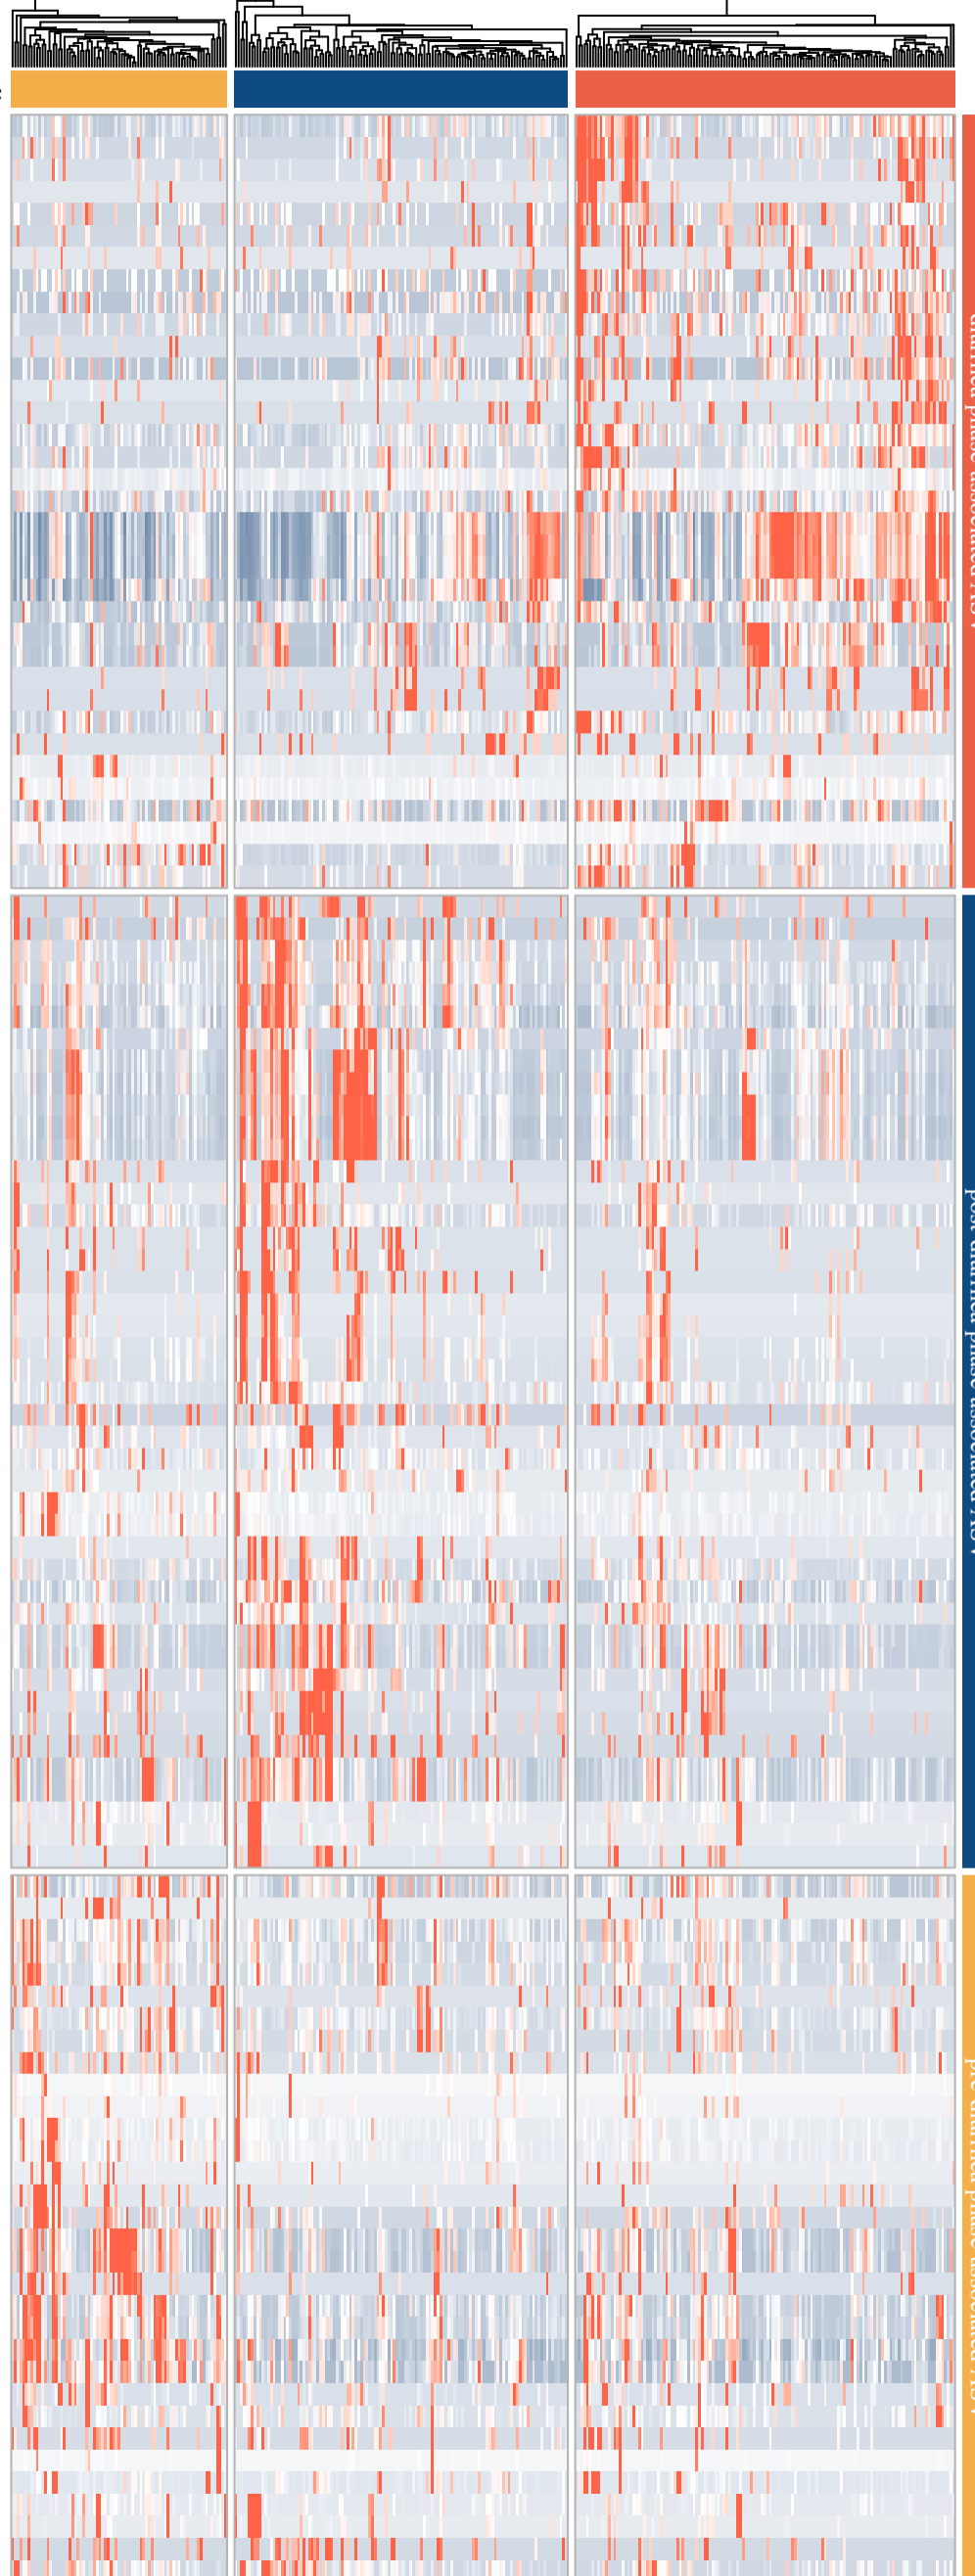

- ASV11-Firmicutes-Clostridiaceae\_1-Clostridium\_sensu\_stricto\_1
- ASV183-Firmicutes-Clostridiaceae\_1-Clostridium\_sensu\_stricto\_1
- ASV196-Proteobacteria-Enterobacteriaceae-unclassified
- ASV259-Proteobacteria-Enterobacteriaceae-ATCC-39006
- ASV239-Fusobacteria-Fusobacteriaceae-unclassified
- ASV252-Fusobacteria-Fusobacteriaceae-unclassified
- ASV376-Fusobacteria-Fusobacteriaceae-unclassified
- ASV230-Fusobacteria-Fusobacteriaceae-unclassified
- ASV203-Fusobacteria-Fusobacteriaceae-unclassified
- ASV195-Fusobacteria-Fusobacteriaceae-unclassified
- ASV211-Fusobacteria-unclassified-unclassified
- ASV151-Proteobacteria-Enterobacteriaceae-unclassified
- ASV232-Proteobacteria-Enterobacteriaceae-unclassified
- ASV153-Firmicutes-Clostridiaceae\_1-Clostridium\_sensu\_stricto\_1
- ASV63-Firmicutes-Clostridiaceae\_1-Clostridium\_sensu\_stricto\_1
- ASV87-Firmicutes-Clostridiaceae\_1-Clostridium\_sensu\_stricto\_1
- ASV57-Firmicutes-Clostridiaceae\_1-Clostridium\_sensu\_stricto\_1
- ASV167-Fusobacteria-Fusobacteriaceae-unclassified
- ASV17-Fusobacteria-Fusobacteriaceae-Fusobacterium
- ASV2-Fusobacteria-Fusobacteriaceae-Fusobacterium
- ASV5-Fusobacteria-Fusobacteriaceae-Fusobacterium
- ASV1-Fusobacteria-Fusobacteriaceae-Fusobacterium
- ASV60-Firmicutes-Clostridiaceae\_1-Clostridium\_sensu\_stricto\_1
- ASV65-Fusobacteria-Fusobacteriaceae-Fusobacterium
- ASV33-Fusobacteria-Fusobacteriaceae-Fusobacterium
- ASV247-Proteobacteria-Burkholderiaceae-Sutterella
- ASV285-Proteobacteria-Burkholderiaceae-Sutterella
- ASV48-Firmicutes-Clostridiaceae\_1-Clostridium\_sensu\_stricto\_1
- ASV330-Bacteroidetes-Bacteroidaceae-Bacteroides
- ASV78-Firmicutes-Ruminococcaceae-Subdoligranulum
- ASV77-Firmicutes-Ruminococcaceae-Ruminococcus\_2
- ASV128-Firmicutes-Ruminococcaceae-Ruminiclostridium\_5
- ASV122-Verrucomicrobia-Akkermansiaceae-Akkermansia
- ASV13-Epsilonbacteraeota-Campylobacteraceae-Campylobacter
- ASV180-Proteobacteria-Enterobacteriaceae-unclassified

- ASV148-Bacteroidetes-Prevotellaceae-Prevotella\_9
- ASV162-Bacteroidetes-Prevotellaceae-Prevotella\_9
- ASV91-Bacteroidetes-Prevotellaceae-Prevotella\_9
- ASV89-Bacteroidetes-Prevotellaceae-Prevotella\_9
- ASV52-Bacteroidetes-Prevotellaceae-Prevotella\_9
- ASV43-Bacteroidetes-Prevotellaceae-Prevotella\_9
- ASV69-Bacteroidetes-Prevotellaceae-Alloprevotella
- ASV29-Bacteroidetes-Prevotellaceae-Alloprevotella
- ASV30-Bacteroidetes-Prevotellaceae-Alloprevotella
- ASV24-Bacteroidetes-Prevotellaceae-Alloprevotella
- ASV28-Bacteroidetes-Prevotellaceae-Alloprevotella
- ASV14-Bacteroidetes-Prevotellaceae-Alloprevotella
- ASV152-Bacteroidetes-Prevotellaceae-Prevotella\_7
- ASV133-Bacteroidetes-Prevotellaceae-Prevotella\_9
- ASV93-Bacteroidetes-Prevotellaceae-Prevotella\_9
- ASV174-Firmicutes-Veillonellaceae-Anaerovibrio
- ASV222-Firmicutes-Veillonellaceae-Anaerovibrio
- ASV123-Bacteroidetes-Prevotellaceae-Prevotella\_9
- ASV146-Bacteroidetes-Prevotellaceae-Prevotella\_9
- ASV145-Bacteroidetes-Prevotellaceae-Prevotella\_9
- ASV97-Bacteroidetes-Prevotellaceae-Prevotella\_9
- ASV94-Bacteroidetes-Prevotellaceae-Prevotella\_9
- ASV35-Proteobacteria-Succinivibrionaceae-Succinivibrio
- ASV92-Bacteroidetes-Bacteroidaceae-Bacteroides
- ASV104-Bacteroidetes-Bacteroidaceae-Bacteroides
- ASV74-Actinobacteria-Coriobacteriaceae-Collinsella
- ASV204-Firmicutes-Erysipelotrichaceae-Erysipelotrichaceae\_UCG-003
- ASV100-Actinobacteria-Coriobacteriaceae-Collinsella
- ASV81-Actinobacteria-Coriobacteriaceae-Collinsella
- ASV157-Bacteroidetes-Prevotellaceae-Prevotellaceae\_UCG-003
- ASV95-Bacteroidetes-Prevotellaceae-Prevotellaceae\_UCG-003
- ASV8-Firmicutes-Ruminococcaceae-Faecalibacterium
- ASV118-Firmicutes-Lachnospiraceae-Lachnoclostridium
- ASV31-Bacteroidetes-Prevotellaceae-Alloprevotella
- ASV42-Bacteroidetes-Prevotellaceae-Alloprevotella
- ASV84-Bacteroidetes-Bacteroidaceae-Bacteroides
- ASV172-Bacteroidetes-Tannerellaceae-Parabacteroides
- ASV163-Bacteroidetes-Tannerellaceae-Parabacteroides
- ASV142-Bacteroidetes-Bacteroidaceae-Bacteroides
- ASV26-Bacteroidetes-Prevotellaceae-Prevotella\_2
- ASV4-Bacteroidetes-Prevotellaceae-Prevotella\_2
- ASV96-Bacteroidetes-Muribaculaceae-unclassified
- ASV120-Bacteroidetes-Muribaculaceae-unclassified
- ASV173-Firmicutes-Ruminococcaceae-Intestinimonas

- ASV107-Bacteroidetes-Tannerellaceae-Parabacteroides
- ASV206-Bacteroidetes-Bacteroidaceae-Bacteroides
- ASV86-Bacteroidetes-Tannerellaceae-Parabacteroides
- ASV73-Bacteroidetes-Tannerellaceae-Parabacteroides
- ASV141-Bacteroidetes-Tannerellaceae-Parabacteroides
- ASV251-Firmicutes-Ruminococcaceae-Butyrivococcus
- ASV68-Bacteroidetes-Bacteroidaceae-Bacteroides
- ASV125-Bacteroidetes-Bacteroidaceae-Bacteroides
- ASV179-Firmicutes-Ruminococcaceae-Ruminiclostridium\_9
- ASV186-Firmicutes-Erysipelotrichaceae-unclassified
- ASV194-Firmicutes-Ruminococcaceae-Flavonifractor
- ASV100-Actinobacteria-Coriobacteriaceae-Collinsella
- ASV81-Actinobacteria-Coriobacteriaceae-Collinsella
- ASV261-Actinobacteria-Eggerthellaceae-Senegalimassilia
- ASV218-Firmicutes-Ruminococcaceae-Butyrivococcus
- ASV159-Firmicutes-Ruminococcaceae-Butyrivococcus
- ASV7-Bacteroidetes-Bacteroidaceae-Bacteroides
- ASV45-Bacteroidetes-Bacteroidaceae-Bacteroides
- ASV226-Proteobacteria-Enterobacteriaceae-unclassified
- ASV53-Bacteroidetes-Bacteroidaceae-Bacteroides
- ASV20-Bacteroidetes-Bacteroidaceae-Bacteroides
- ASV10-Bacteroidetes-Bacteroidaceae-Bacteroides
- ASV51-Bacteroidetes-Bacteroidaceae-Bacteroides
- ASV99-Firmicutes-Ruminococcaceae-Flavonifractor
- ASV106-Firmicutes-Ruminococcaceae-Pseudoflavonifractor
- ASV88-Bacteroidetes-Bacteroidaceae-Bacteroides
- ASV103-Firmicutes-Ruminococcaceae-Flavonifractor
- ASV79-Bacteroidetes-Bacteroidaceae-Bacteroides
- ASV96-Bacteroidetes-Muribaculaceae-unclassified
- ASV120-Bacteroidetes-Muribaculaceae-unclassified
- ASV142-Bacteroidetes-Bacteroidaceae-Bacteroides
- ASV93-Bacteroidetes-Prevotellaceae-Prevotella\_9

Identified both in pre-diarrhea vs. diarrhea and post-diarrhea vs diarrhea

Identified in pre-diarrhea vs. diarrhea

Identified in post-diarrhea vs diarrhea

diarrhea phase-associated ASV

post-diarrhea phase-associated ASV

pre-diarrhea phase-associated ASV
